# Supplementary material
Source: PubMed Central journal article supplement (PMC4453792)
Supplement: supp_pp.15.00402_00402suppfig2.pdf [file supp_pp.15.00402_00402suppfig2.pdf]

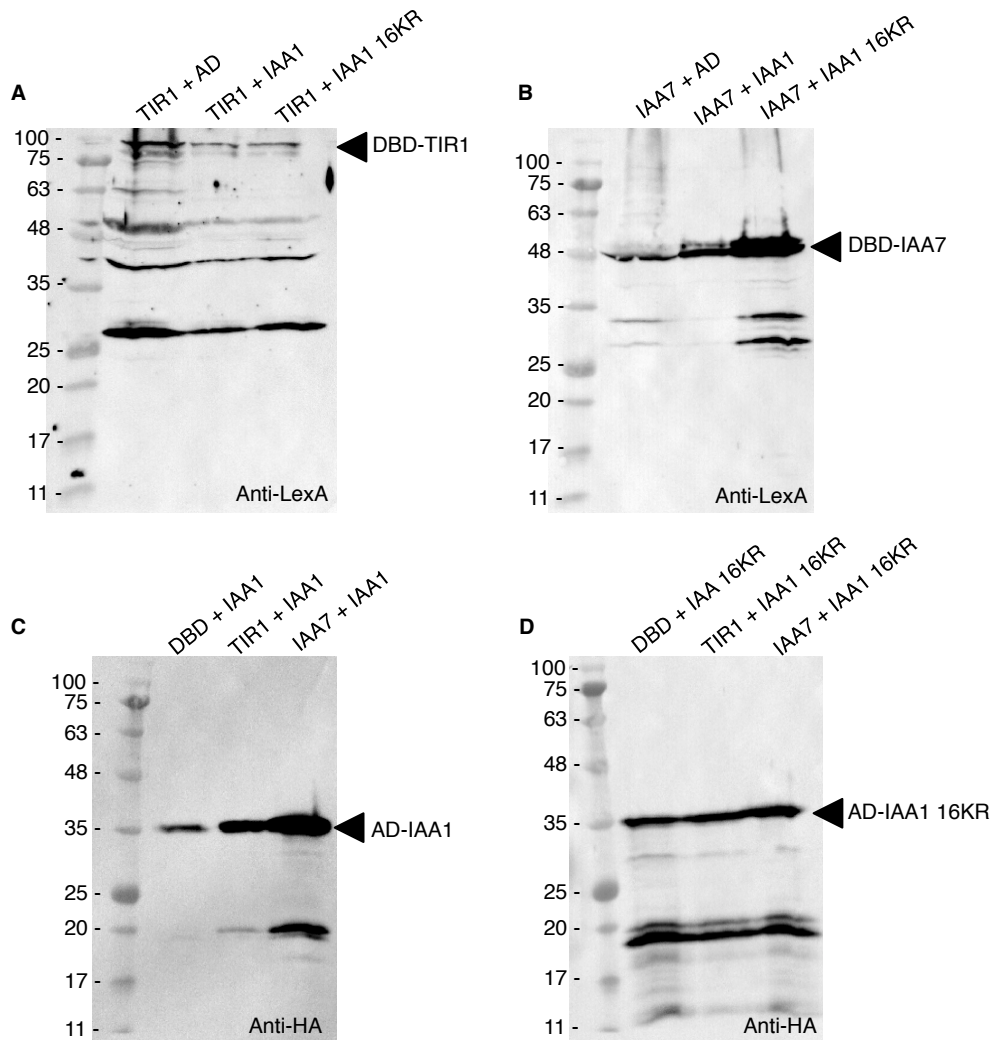

Supplemental Figure 2: Yeast strains used for two-hybrid assays accumulate the expected DBD and AD fusion proteins. DBD fusion proteins are recognized by an anti-LexA DNA binding domain antibody while AD fusion proteins are recognized by an anti-HA antibody; ~ 20  $\mu$ g of total yeast protein extract was loaded per lane. A, DBD-TIR1 (expected size ~ 90 kDa) is present in TIR1 + AD, TIR1 + IAA1 and TIR1 + IAA1 16KR yeast strains. B, DBD-IAA7 (expected size ~ 50 kDa) is present in IAA7 + AD, IAA7 + IAA1 and IAA7 + IAA1 16KR yeast strains. C, AD-IAA1 (expected size ~ 30 kDa) is present in DBD + IAA1, TIR1 + IAA1 and IAA7 + IAA1 yeast strains. D, AD-IAA1 (expected size ~ 30 kDa) is present in DBD + IAA1, TIR1 + IAA1 and IAA7 + IAA1 yeast strains.
