# Supplementary material
Source: PubMed Central journal article supplement (PMC4453792)
Supplement: supp_pp.15.00402_00402suppfig4.pdf [file supp_pp.15.00402_00402suppfig4.pdf]

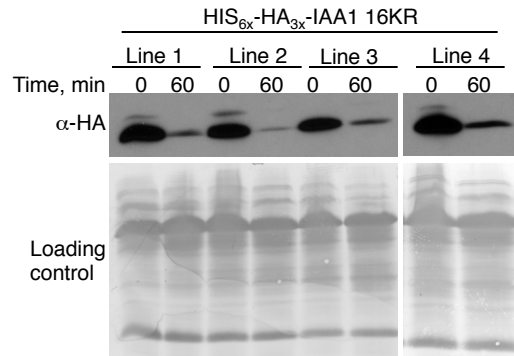

Supplemental Figure 4. Single time point CHX assays of the 16KR protein. Experiments were performed as described for Figure 5, except transgenic lines expressing 16KR protein were used.
