# Supplementary material
Source: PubMed Central journal article supplement (PMC4453792)
Supplement: supp_pp.15.00402_00402supptbl.pdf [file supp_pp.15.00402_00402supptbl.pdf]

Supplemental Table 1. Oligonucleotide Primers Used for Cloning

| Name  | Sequence (5' to 3')                                  | Use                                                                                |
|-------|------------------------------------------------------|------------------------------------------------------------------------------------|
| 8-110 | GGGGACAAGTTTGTACAAAAAAGCAGGCTTGATGGAAGTCACCAATGGGC   | Amplify IAA1 CDS for gateway cloning                                               |
| 3-192 | GGGGACCACCTTTGTACAAGAAAGCTGGGTCTCATAAGGCAGTAGGAGCTTC | Amplify IAA1 CDS for gateway cloning                                               |
| 3-250 | CATGCACCATCACCATCACCATGC                             | Oligos for HIS <sub>6x</sub> CDS with KpnI/NcoI ends for ligation pLit 29 HA3x-ORF |
| 3-254 | CATGGTACGTGGTAGTGGTAGTGGTACGGTAC                     | Oligos for HIS <sub>6x</sub> CDS with KpnI/NcoI ends for ligation pLit 29 HA3x-ORF |
| 3-310 | GGGTTT CATATGGAAGTCACCAATGGG                         | Amplify IAA1 with NdeI/BamHI sites for ligation into pLit29 HIS6x-HA3x             |
| 3-311 | CGCGGATCCTCATAAGGCAGTAGGAGCTTC                       | Amplify IAA1 with NdeI/BamHI sites for ligation into pLit29 HIS6x-HA3x             |
| 3-248 | GTCAGAAGCAACAACAGGCGGAGGAACAACG                      | IAA1 K37,39R                                                                       |
| 3-249 | CGTTGTTCCCTCCGCTGTTGTTGCTTCTGAC                      | IAA1 K37,39R                                                                       |
| 3-184 | CTCCTCCTCCTACAAGAACAACAATCGTTGG                      | IAA1 K53R                                                                          |
| 3-185 | CCAACGATTTGTGTTCTTGTAGGAGGAGGAG                      | IAA1 K53R                                                                          |
| 3-186 | CCAGTGAGATCTAACCGTAGGAACAACAACAA                     | IAA1 K67R                                                                          |
| 3-187 | GTTGTTGTTGTTCTACGGTTAGATCTCACTGG                     | IAA1 K67R                                                                          |
| 3-188 | CGTGAGTTATGTGAGAGTGAGTATGGACGGAGC                    | IAA1 K78R                                                                          |
| 3-189 | GCTCCGTCATACTACTCTCACATAACTCACG                      | IAA1 K78R                                                                          |
| 3-190 | GCTCCATATCTCCGTAGGATAGATCTCAAGATG                    | IAA1 K89R                                                                          |
| 3-191 | CATCTTGAGATCTATCCTACGGAGATATGGAGC                    | IAA1 K89R                                                                          |
| 3-197 | CTCCGTAGGATAGATCTCAGGATGTACAGAACTATCCAGAGCTTC        | IAA1 K93,96R                                                                       |
| 3-198 | GAAGCTCTGGATAGTTTCTGTACATCCTGAGATCTATCCTACGGAG       | IAA1 K93,96R                                                                       |
| 3-199 | CCTACTTATGAAGACAGAGATGGAGATTGGAG                     | IAA1 K134R                                                                         |
| 3-200 | CTCCAATCTCCATCTCTGTCTTCATAAGTAGG                     | IAA1 K134R                                                                         |
| 3-201 | CTTTCATCTTGTCAAAGACTCAGAATTATGAAAGG                  | IAA1 K155R                                                                         |
| 3-202 | CCTTTCATAATTCTGAGTCTTTGACAAGATGAAGAG                 | IAA1 K155R                                                                         |
| 3-203 | CTCAGAATTATGAGAGGGTCCGAAGCTCC                        | IAA1 K160R                                                                         |
| 3-204 | GGAGCTTCGGACCCTCTCATAATTCTGAG                        | IAA1 K160R                                                                         |
| DK807 | aaaaaGAATTCATGGAAGTCACCAATGGGCT                      | for Y2H expression                                                                 |
| DK808 | aaaaCTCGAGTCATAAGGCAGTAGGAGCTTCG                     | for Y2H expression                                                                 |
